# Supplementary material
Source: PubMed Central journal article supplement (PMC2662608)
Supplement: NIHMS91404-supplement-2_si_002.pdf [file NIHMS91404-supplement-2_si_002.pdf]

# Platinum(II) Enyne Cycloisomerization Catalysis: Intermediates and Resting States

## Supporting Information

D. Luke Nelsen and Michel R. Gagné

*Department of Chemistry, University of North Carolina at Chapel Hill  
Chapel Hill, NC 27599*

### Table of Contents

1. General Procedures
2. Substrate Synthesis
3. Isolation of Pt-alkenyls
4. Catalytic Conditions
5. Protonolysis/Deuterolysis of Pt-alkenyls
6. Reductive Cleavage of Pt-alkenyls
7. Crystallographic Data for **3**

### General Procedures

Synthetic procedures were carried out under nitrogen using standard Schlenk techniques or in a nitrogen filled glove box.  $\text{CD}_2\text{Cl}_2$  and  $\text{CD}_3\text{NO}_2$  were distilled from  $\text{CaH}_2$  and freeze-pump-thaw degassed before use.  $\text{MeNO}_2$  was purified as previously described<sup>[1]</sup> and distilled from  $\text{CaH}_2$ . TriPHOS, dppe, and BINAP were purchased from Aldrich and used as received. (*S*)-Me-SoniPHOS and (*S*)-MeOBIPHEP were purchased from Strem and used as received. The piperidinomethyl polystyrene resin was purchased from NovaBiochem.  $(\text{COD})\text{PtI}_2$ ,<sup>[2]</sup>  $(\text{P}_2)(\text{PMe}_3)\text{PtI}_2$ ,<sup>[3]</sup>  $(\text{PPP})\text{PtI}_2$ , and  $[(\text{PPP})\text{Pt}(\text{NCC}_6\text{F}_5)][\text{BF}_4]_2$ <sup>[4]</sup> were prepared according to literature procedures. NMR spectra were recorded on a Bruker 400 MHz Avance or Bruker 500 MHz Avance spectrometer; chemical shifts are reported in ppm and referenced to residual solvent peaks ( $^1\text{H}$ ,  $^{13}\text{C}$ ) or to an external standard (85%  $\text{H}_3\text{PO}_4$  for  $^{31}\text{P}$  NMR). GC was performed on an HP-6890. Elemental microanalyses were performed by Robertson-Microlit Laboratories, Madison, NJ. High-resolution mass spectrometry was performed by the mass spectrometry service laboratory at the University of Illinois.

**Synthesis of 1:** The (2E)-7,7-Dibromo-3-methylhepta-2,6-dien-1-ol was obtained following a modified procedure established by Malacria.<sup>5</sup> The substrate was protected with a TBS group, followed by a Corey-Fuchs to the methyl alkyne. Cleavage of the TBS group with TBAF generated the free alcohol, which was converted to the

allyl chloride with treatment of NCS/DMS. Nucleophilic displacement of the chloride with sodium phenoxide yielded the desired product (**1**) (E)-2-(3-methyloct-2-en-6-ynyl)phenol.

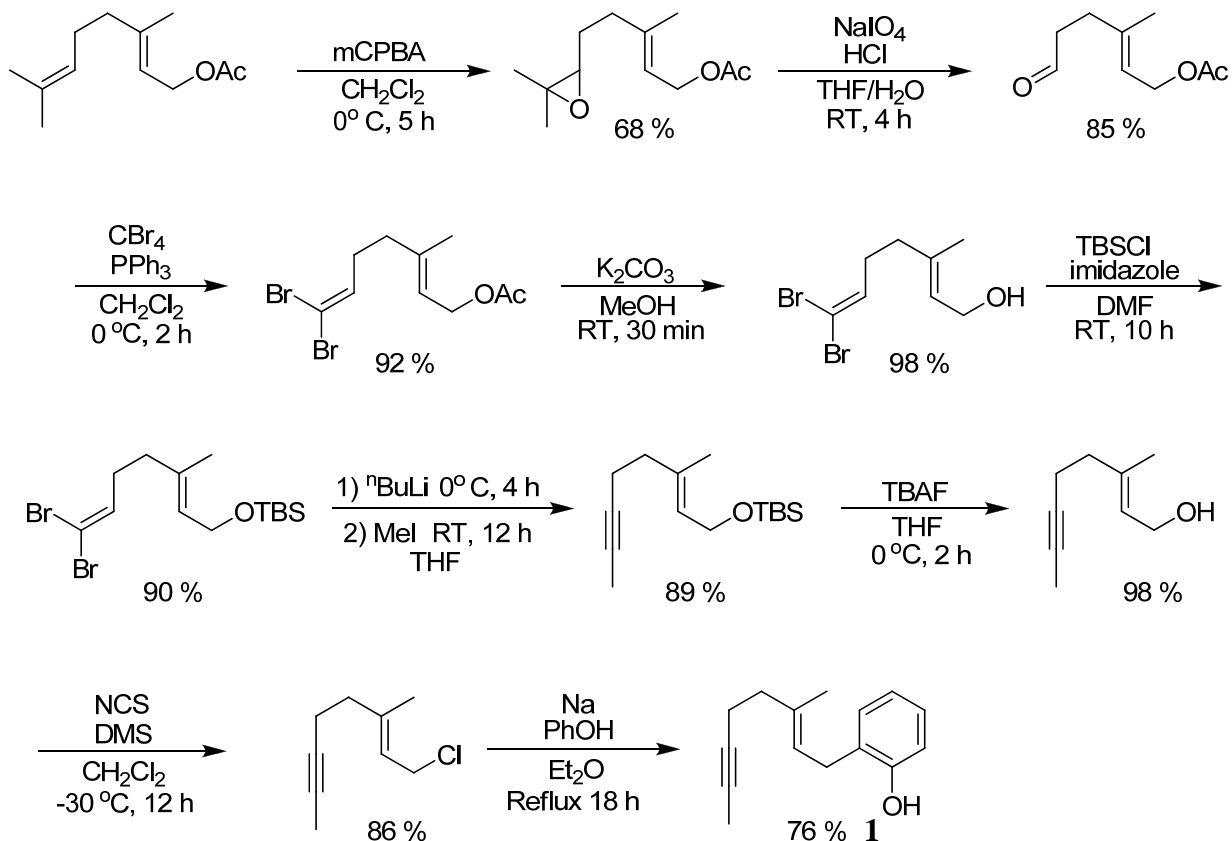

(**E**)-2-(3-methyloct-2-en-6-ynyl)phenol (**1**) was isolated as a colorless oil. <sup>1</sup>H NMR: (400 MHz, CDCl<sub>3</sub>) 7.10 (t, *J* = 7.6 Hz, 2H), 6.84 (t, *J* = 7.6 Hz, 1 H), 6.79 (d, *J* = 7.6 Hz, 1H), 5.37 (t, *J* = 6.8 Hz, 1H), 5.04 (s, 1H), 3.36 (d, 7.2 *J* = Hz, 2H), 2.27-2.18 (m, 4H), 1.75 (s, 6H). <sup>13</sup>C NMR: (100 MHz, CDCl<sub>3</sub>) δ 154.2, 136.3, 129.7, 127.2, 127.0, 122.8, 120.5, 115.6, 78.5, 76.3, 38.7, 29.2, 17.5, 15.6, 3.3. HRMS (ESI+) *m/z* [M+H]<sup>+</sup>: observed 215.1234, calculated. 215.1436 for C<sub>15</sub>H<sub>18</sub>O.

(**E**)-2-(3-methylhept-2-en-6-ynyl)phenol (**5**) was prepared analogously to **1** and isolated as a colorless oil. <sup>1</sup>H NMR: (400 MHz, CDCl<sub>3</sub>) δ 7.01 (t, *J* = 8.0 Hz, 2H), 6.84 (t, *J* = 8.0 Hz, 1H), 6.78 (d, *J* = 8.0 Hz, 1H), 5.42 (td, *J* = 8.0 and 1.0 Hz, 1H), 5.04 (s, 1H), 3.40 (d, *J* = 7.1 Hz, 2H), 2.37-2.27 (m, 4H), 1.98 (t, *J* = 2.5 Hz, 1H), 1.79 (s, 3H). <sup>13</sup>C NMR: (100 MHz, CDCl<sub>3</sub>) δ 154.1, 136.1, 129.9, 127.4, 126.8, 123.1, 120.7, 115.7, 83.8, 68.9, 38.2, 29.4, 17.3, 15.8. HRMS (EI+) *m/z* [M]<sup>+</sup>: observed 200.1199, calcd. 200.1201 for C<sub>14</sub>H<sub>16</sub>O.

**General Procedure for Isolation of Pt-alkenyls.**

To a solution of [(PPP)Pt(NCC<sub>6</sub>F<sub>5</sub>)](BF<sub>4</sub>)<sub>2</sub> (0.60 mmol) and piperidinomethyl polystyrene resin (1.20 mmol) in CH<sub>2</sub>Cl<sub>2</sub> was added enyne (**1** or **5**) (0.70 mmol). The solution was allowed to stir for 15 min in air then the basic resin was filtered off and the Pt-alkenyl precipitated with Et<sub>2</sub>O.

**(PPP)Pt-alkenyl (3).** After following the procedure described above, the resulting white solid was washed with Et<sub>2</sub>O, dissolved in CH<sub>2</sub>Cl<sub>2</sub> and diluted with Et<sub>2</sub>O. The solvent was allowed to evaporate, yielding colorless needles (95 %). The NMRs for this complex were taken at -68 °C. <sup>1</sup>H{<sup>31</sup>P} NMR: (400 MHz, CD<sub>2</sub>Cl<sub>2</sub>) δ 7.60 (d, *J* = 8.0 Hz, 2H), 7.54 (d, *J* = 8.0 Hz, 2H), 7.51-7.45 (m, 8H), 7.32-7.19 (m, 13H), 6.98 (t, *J* = 8.0 Hz, 1H), 6.90 (d, *J* = 8.0 Hz, 1H), 6.72 (t, *J* = 8.0 Hz, 1H), 6.60 (t, *J* = 8.0 Hz, 1H), 3.45 (b, 2H), 2.87 (b, 2H), 2.55 (b, 4H), 2.11 (b, 2H), 2.08 (m, 2H), 1.80 (s, 2H), 1.52 (m, 1), 0.77 (s, 3H), -0.33(s, 3H). <sup>31</sup>P{<sup>1</sup>H} NMR: (162 MHz, CDCl<sub>3</sub>). δ 88.09 (s, *J*<sub>Pt-P</sub> = 1398 Hz, 1P), 39.79 (s, *J*<sub>Pt-P</sub> = 2775 Hz, 2P). HRMS (ESI+) *m/z* [M]<sup>+</sup>: observed 941.2664, calcd. 941.2701 for C<sub>49</sub>H<sub>50</sub>OP<sub>3</sub>Pt.

**(PPP)Pt-alkenyl (6).** After following the procedure described above, the resulting solid was washed with Et<sub>2</sub>O and dried in vacuo yielding desired product in 97 %. <sup>1</sup>H{<sup>31</sup>P} NMR: (400 MHz, CDCl<sub>3</sub>) δ 7.78 (d, *J* = 8.0 Hz, 2H), 7.61 (d, *J* = 8.0 Hz, 2H), 7.50-7.42 (m, 21H), 7.00 (t, *J* = 8.0 Hz, 1H), 6.93 (d, *J* = 8.0 Hz, 1H), 6.74 (t, *J* = 8.0 Hz, 1H), 6.66 (t, *J* = 8.0 Hz, 1H), 4.59 (d, *J* = 12 Hz, *J*<sub>Pt-H</sub> = 44.0 Hz, 1H) 3.24 (b, 2H), 2.93 (m, 2H), 2.53 (m, 4H), 2.11 (m, 2H), 2.08 (m, 2H), 2.01 (m, 1H), 1.41 (m, 1H), 1.33(m, 1H), 0.55 (s, 3H). <sup>31</sup>P{<sup>1</sup>H} NMR: (162 MHz, CDCl<sub>3</sub>). δ 89.82 (s, *J*<sub>Pt-P</sub> = 1438 Hz, 1P), 38.52 (s, *J*<sub>Pt-P</sub> = 2812 Hz, 2P). HRMS (ESI+) *m/z* [M]<sup>+</sup>: observed 927.2545, calcd. 927.2511 for C<sub>48</sub>H<sub>48</sub>OP<sub>3</sub>Pt.

### General Procedure for Catalysis.

To a solution of (PPP)PtI<sub>2</sub> (0.30 mmol) in CD<sub>3</sub>NO<sub>2</sub> was added AgBF<sub>4</sub> (0.60 mmol). The reaction was stirred for 1 h, then the catalyst was filtered away from the silver salts via a PTFE syringe filter into a solution of **1** or **5** (1.5 mmol) and Ph<sub>2</sub>NMe (0.45 mmol) in CD<sub>3</sub>NO<sub>2</sub>. The reaction was monitored by <sup>31</sup>P and <sup>1</sup>H NMR. Once the substrate was consumed the product was extracted with 1 mL pentane (2x). The pentane was removed via rotary evaporation to yield the isolated product.

**1,4a-dimethyl-4,4a,9,9a-tetrahydro-3H-xanthene (2)** was prepared as described above and isolated as a colorless oil in 87 % yield. <sup>1</sup>H NMR: (400 MHz, CDCl<sub>3</sub>) δ 7.12-7.07 (m, 2H), 6.82 (td, *J* = 8.4 and 2.8 Hz, 2H), 5.38 (s, 1H), 2.86 (m, 1H), 2.52 (m, 2H), 2.17 (m, 2H), 1.96-1.82 (m, 2H), 1.52 (s, 3H), 1.10 (s, 3H). δ <sup>13</sup>C NMR: (100 MHz, CDCl<sub>3</sub>) δ 153.7, 133.6, 129.8, 127.4, 122.5, 121.5, 119.7, 117.4, 76.0, 42.0, 35.5, 25.9, 24.1, 19.8, 16.6. HRMS (ESI+) *m/z* [M+H]<sup>+</sup>: observed 215.1234, calcd. 215.1436 for C<sub>15</sub>H<sub>19</sub>O.

**4a-methyl-4,4a,9,9a-tetrahydro-1H-xanthene (7)** was prepared as described above and isolated as a colorless oil in 96 % yield. <sup>1</sup>H and <sup>13</sup>C NMR matched previously reported data.<sup>6</sup>

### General Procedure for Protonolysis/Deuterolysis of Pt-alkenyl

To a solution of **3** or **6** in CH<sub>2</sub>Cl<sub>2</sub>/CD<sub>2</sub>Cl<sub>2</sub> was added HBF<sub>4</sub> as a solution in Et<sub>2</sub>O and CH<sub>3</sub>OH/CD<sub>3</sub>OD. The reaction stirred for 10 min. Solution was then washed with H<sub>2</sub>O/D<sub>2</sub>O, extracted with pentane, dried over MgSO<sub>4</sub>, and filtered. The solvent was removed via rotary evaporation yielding the desired product.

**1,4a-dimethyl-4,4a,9,9a-tetrahydro-3H-xanthene (2)** was isolated as a colorless oil in 96 % yield; <sup>1</sup>H and <sup>13</sup>C NMR matched above spectra.

**4a-methyl-4,4a,9,9a-tetrahydro-1H-xanthene (7)** was isolated as a colorless oil in 95 % yield; <sup>1</sup>H and <sup>13</sup>C NMR matched previously reported data.<sup>6</sup>

**2-d<sub>1</sub>**: was isolated as a colorless oil in 96 % yield. <sup>1</sup>H NMR: (400 MHz, CDCl<sub>3</sub>) δ 7.07 (m, 2H), 6.81 (m, 2H), 2.86 (m, 1H), 2.50 (m, 2H), 2.19 (m, 2H), 1.92 (m, 2H), 1.71 (s, 3H), 1.10 (s, 3H). <sup>13</sup>C NMR: (100 MHz, CDCl<sub>3</sub>) δ 153.6, 133.5, 129.9, 127.5, 122.5, 121.5 (C-D), 119.7, 117.4, 76.1, 41.9, 35.5, 25.9, 24.0, 19.8, 16.6. <sup>2</sup>H NMR: (500 MHz, CHCl<sub>3</sub>) δ 5.42 (s, 1D). HRMS (EI+) *m/z* [M]<sup>+</sup>: observed 215.1423, calcd. 215.1420 for C<sub>14</sub>H<sub>17</sub>DO.

**7-d<sub>2</sub>**: was isolated as a colorless oil in 94 % yield. <sup>1</sup>H NMR: (400 MHz, CDCl<sub>3</sub>) δ 7.07 (t, *J* = 8.0 Hz, 1H), 7.01 (d, *J* = 8.0 Hz, 1H), 6.82 (m, 2H), 5.49 (s, 1H), 2.71 (d, *J* = 4.0 Hz, 1H), 2.48 (m, 3.5H), 2.13 (m, 1H), 1.78 (m, 0.5H), 1.10 (s, 3H). <sup>13</sup>C NMR: (100 MHz, CDCl<sub>3</sub>) δ 153.9, 129.7, 127.2, 125.5 (C-D), 125.3, 125.1, 120.0, 117.0, 76.0, 39.9, 34.2, 31.8 (C-D), 31.1, 16.1. <sup>2</sup>H NMR: (500 MHz, CHCl<sub>3</sub>) δ 5.49 (s, 1D), 2.36 (s, 0.5D), 1.77 (s, 0.5D). HRMS (EI+) *m/z* [M]<sup>+</sup>: observed 202.1325, calcd. 202.1327 for C<sub>14</sub>H<sub>14</sub>D<sub>2</sub>O.

### General Procedure for Reductive Cleavage of Organic Fragment.

To a solution of **3** or **6** in THF at 0 °C was added LiHBET<sub>3</sub> in THF. The reaction was stirred for 30 min. Solvent was removed via rotary evaporation and the product was extracted with pentane and filtered through celite. The solvent was then removed via rotary evaporation to yield the desired product.

**4a-methyl-4,4a,9,9a-tetrahydro-3H-xanthene (8)** was isolated as a colorless oil in 89 % yield. <sup>1</sup>H NMR: (400 MHz, CDCl<sub>3</sub>) δ 7.07 (m, 2H), 6.82 (t, *J* = 9.6 Hz, 2H), 5.65 (d, *J* = 12.8 Hz, 1H), 5.47 (d, *J* = 12.8 Hz, 1H), 2.69 (d, *J* = 14.0 Hz, 1H), 2.52 (m, 2H), 2.22 (m, 3H), 1.91 (m, 2H), 1.14 (s, 3H). <sup>13</sup>C NMR: (100 MHz, CDCl<sub>3</sub>) δ 153.2, 132.9, 130.1, 127.7, 122.7, 122.0, 119.3, 118.4, 75.2, 42.7, 35.5, 24.5, 19.6, 15.6. HRMS (EI+) *m/z* [M]<sup>+</sup>: observed 200.1204, calcd. 200.1201 for C<sub>14</sub>H<sub>16</sub>O.

**4a-methyl-4,4a,9,9a-tetrahydro-1H-xanthene (7)** was isolated as a colorless oil in 87 % yield. <sup>1</sup>H and <sup>13</sup>C NMR matched previously reported data.<sup>6</sup>

### X-ray Structure Determinations.

Crystals of **3** suitable for X-ray crystallography were grown from a sample of **3** in a solution of CH<sub>2</sub>Cl<sub>2</sub> and *n*-pentane. Single crystals were mounted on the ends of a fiber. Intensity data were collected on a Siemens SMART diffractometer with CCD detection using Mo K $\alpha$  radiation of wavelength 0.71073 Å (to scan mode). The structure was solved by direct methods and refined by least squares techniques on *F* using structure solution programs from the NARCVAX system.<sup>7</sup> Phenyl ring thermal parameters and geometries had to be constrained due to a large portion of weak reflections. All non-hydrogen atoms were refined anisotropically. All hydrogen atoms were placed in calculated positions (C-H = 0.96 Å) and allowed to ride on the atoms to which they were bonded. Crystal data, data collection and the refinement parameters for **3** are listed in Table S1. Absorption corrections were made using SADABS.

**Table S1.** Crystallographic data and collection parameters for **3**.

| <b>3</b>                                 |                                                                    |
|------------------------------------------|--------------------------------------------------------------------|
| Empirical Formula                        | C <sub>49</sub> H <sub>50</sub> BF <sub>4</sub> OP <sub>3</sub> Pt |
| FW                                       | 1029.70                                                            |
| Space group                              | Monoclinic, P2 <sub>1</sub> /c                                     |
| <i>A</i>                                 | 10.4824(8)                                                         |
| <i>B</i>                                 | 23.673(2)                                                          |
| <i>C</i>                                 | 18.98784(16)                                                       |
| <i>V</i> , Å <sup>3</sup>                | 4538.5(7)                                                          |
| <i>Z</i>                                 | 4                                                                  |
| <i>T</i> , K                             | 100(2)                                                             |
| <i>D<sub>c</sub></i> , Mg/m <sup>3</sup> | 1.507                                                              |
| $\lambda$ , Å                            | 0.71073                                                            |
| $\mu$ , mm <sup>-1</sup>                 | 3.249                                                              |
| <i>R<sub>f</sub></i> <sup>a</sup>        | 0.1271                                                             |
| <i>R<sub>w</sub></i> <sup>b</sup>        | 0.2707                                                             |
| GOF <sup>c</sup>                         | 1.111                                                              |

$${}^a R_f = \Sigma(F_o - F_c) / \Sigma F_o \quad {}^b R_w = [\Sigma \omega(F_o - F_c)^2 / \Sigma \omega F_o^2]^{1/2} \quad {}^c \text{GOF} = [\Sigma \omega(F_o - F_c)^2 / (n-p)]^{1/2},$$

where *n* = number of reflections and *p* = number of parameters.

**Table S2.** Atomic coordinates (x 10<sup>4</sup>) and equivalent isotropic displacement parameters (Å<sup>2</sup>x 10<sup>3</sup>) for **3**. U(eq) is defined as one third of the trace of the orthogonalized U<sup>ij</sup> tensor.

|       | x       | y       | z       | U(eq) |
|-------|---------|---------|---------|-------|
| Pt(1) | 2711(1) | 9200(1) | 2747(1) | 57(1) |
| P(1)  | 4759(5) | 9253(3) | 3523(3) | 55(2) |
| P(2)  | 2001(5) | 9177(3) | 3792(4) | 62(2) |

|       |           |          |           |         |
|-------|-----------|----------|-----------|---------|
| P(3)  | 560(5)    | 9372(3)  | 2172(4)   | 69(2)   |
| C(1)  | 3301(16)  | 9198(9)  | 1763(11)  | 38(5)   |
| C(2)  | 3580(20)  | 9762(9)  | 1436(12)  | 52(6)   |
| C(3)  | 3510(20)  | 9732(10) | 613(13)   | 58(7)   |
| C(4)  | 4290(20)  | 9242(11) | 481(12)   | 58(6)   |
| O(5)  | 4259(14)  | 9241(7)  | -294(9)   | 62(4)   |
| C(6)  | 4600(20)  | 8748(11) | -581(14)  | 54(6)   |
| C(7)  | 4800(20)  | 8799(12) | -1301(13) | 59(7)   |
| C(8)  | 5140(20)  | 8316(13) | -1609(14) | 67(7)   |
| C(9)  | 5280(20)  | 7832(13) | -1285(16) | 70(8)   |
| C(10) | 5120(20)  | 7773(11) | -579(16)  | 69(8)   |
| C(11) | 4790(20)  | 8255(12) | -239(14)  | 64(7)   |
| C(12) | 4470(20)  | 8186(10) | 535(14)   | 64(7)   |
| C(13) | 3640(20)  | 8708(10) | 645(13)   | 57(6)   |
| C(14) | 3296(19)  | 8726(10) | 1379(15)  | 58(7)   |
| C(15) | 5730(20)  | 9302(10) | 893(13)   | 61(7)   |
| C(16) | 2980(20)  | 8149(12) | 1651(14)  | 74(8)   |
| C(17) | 6035(7)   | 8730(4)  | 3465(6)   | 62(6)   |
| C(18) | 6100(10)  | 8519(4)  | 2787(6)   | 69(6)   |
| C(19) | 7072(12)  | 8132(4)  | 2739(8)   | 81(7)   |
| C(20) | 7979(10)  | 7955(4)  | 3369(9)   | 97(9)   |
| C(21) | 7915(11)  | 8165(4)  | 4046(8)   | 96(9)   |
| C(22) | 6943(11)  | 8552(4)  | 4095(6)   | 89(8)   |
| C(23) | 5514(8)   | 9949(4)  | 3489(5)   | 51(5)   |
| C(24) | 6852(8)   | 9977(4)  | 3476(5)   | 84(9)   |
| C(25) | 7378(10)  | 10516(4) | 3456(8)   | 100(11) |
| C(26) | 6625(12)  | 11029(4) | 3462(8)   | 71(7)   |
| C(27) | 5282(11)  | 10948(4) | 3464(7)   | 72(7)   |
| C(28) | 4708(9)   | 10433(4) | 3472(7)   | 63(6)   |
| C(29) | 4560(20)  | 9218(12) | 4464(11)  | 63(7)   |
| C(30) | 3260(30)  | 9478(12) | 4529(14)  | 80(8)   |
| C(31) | 1787(14)  | 8489(5)  | 4122(10)  | 65(6)   |
| C(32) | 1326(14)  | 8430(7)  | 4748(9)   | 75(6)   |
| C(33) | 1124(15)  | 7895(9)  | 5002(8)   | 100(8)  |
| C(34) | 1383(16)  | 7419(6)  | 4631(12)  | 97(9)   |
| C(35) | 1844(17)  | 7478(6)  | 4005(11)  | 105(10) |
| C(36) | 2046(15)  | 8013(7)  | 3750(9)   | 77(7)   |
| C(37) | 370(20)   | 9500(12) | 3610(14)  | 66(7)   |
| C(38) | -390(20)  | 9293(13) | 2870(17)  | 90(10)  |
| C(39) | -258(10)  | 9003(5)  | 1289(9)   | 151(9)  |
| C(40) | -663(16)  | 8472(5)  | 1457(11)  | 152(9)  |
| C(41) | -1296(15) | 8110(6)  | 900(13)   | 155(9)  |
| C(42) | -1523(14) | 8281(7)  | 174(12)   | 162(9)  |
| C(43) | -1118(16) | 8812(8)  | 6(10)     | 161(9)  |
| C(44) | -485(12)  | 9174(6)  | 564(8)    | 159(9)  |
| C(45) | 329(10)   | 10155(5) | 1924(6)   | 77(7)   |
| C(46) | -1010(10) | 10388(5) | 1554(7)   | 86(8)   |
| C(47) | -1073(14) | 10971(5) | 1457(9)   | 111(11) |
| C(48) | 8(16)     | 11307(5) | 1813(9)   | 141(15) |
| C(49) | 1232(14)  | 11090(6) | 2178(10)  | 131(14) |
| C(50) | 1356(12)  | 10497(6) | 2249(8)   | 93(9)   |
| B(1)  | 1230(20)  | 3907(11) | 9160(13)  | 113(9)  |
| F(1)  | 1550(40)  | 3352(10) | 9232(16)  | 239(14) |
| F(2)  | 2320(20)  | 4126(14) | 9008(18)  | 230(13) |
| F(3)  | 920(30)   | 4214(13) | 9700(14)  | 212(11) |
| F(4)  | 230(20)   | 3944(14) | 8553(14)  | 209(12) |

**Table S3. Bond lengths [Å] and angles [°] for 3.**

|             |           |                  |           |
|-------------|-----------|------------------|-----------|
| Pt(1)-C(1)  | 2.10(2)   | C(39)-C(40)      | 1.3900    |
| Pt(1)-P(2)  | 2.275(6)  | C(39)-C(44)      | 1.3900    |
| Pt(1)-P(1)  | 2.283(6)  | C(40)-C(41)      | 1.3900    |
| Pt(1)-P(3)  | 2.284(6)  | C(41)-C(42)      | 1.3900    |
| P(1)-C(23)  | 1.835(11) | C(42)-C(43)      | 1.3900    |
| P(1)-C(29)  | 1.84(2)   | C(43)-C(44)      | 1.3900    |
| P(1)-C(17)  | 1.846(11) | C(45)-C(50)      | 1.3648    |
| P(2)-C(31)  | 1.777(14) | C(45)-C(46)      | 1.5091    |
| P(2)-C(30)  | 1.81(3)   | C(46)-C(47)      | 1.3913    |
| P(2)-C(37)  | 1.82(2)   | C(47)-C(48)      | 1.4115    |
| P(3)-C(38)  | 1.85(2)   | C(48)-C(49)      | 1.3956    |
| P(3)-C(39)  | 1.889(16) | C(49)-C(50)      | 1.4141    |
| P(3)-C(45)  | 1.913(15) | B(1)-F(4)        | 1.348(10) |
| C(1)-C(14)  | 1.33(3)   | B(1)-F(2)        | 1.351(10) |
| C(1)-C(2)   | 1.53(3)   | B(1)-F(1)        | 1.354(10) |
| C(2)-C(3)   | 1.54(3)   | B(1)-F(3)        | 1.355(10) |
| C(3)-C(4)   | 1.48(3)   | C(1)-Pt(1)-P(2)  | 177.6(5)  |
| C(4)-O(5)   | 1.45(2)   | C(1)-Pt(1)-P(1)  | 97.6(5)   |
| C(4)-C(13)  | 1.51(3)   | P(2)-Pt(1)-P(1)  | 84.4(2)   |
| C(4)-C(15)  | 1.52(3)   | C(1)-Pt(1)-P(3)  | 93.0(5)   |
| O(5)-C(6)   | 1.37(3)   | P(2)-Pt(1)-P(3)  | 85.4(2)   |
| C(6)-C(11)  | 1.33(3)   | P(1)-Pt(1)-P(3)  | 162.9(3)  |
| C(6)-C(7)   | 1.43(3)   | C(23)-P(1)-C(29) | 103.1(9)  |
| C(7)-C(8)   | 1.37(3)   | C(23)-P(1)-C(17) | 106.0(4)  |
| C(8)-C(9)   | 1.29(3)   | C(29)-P(1)-C(17) | 106.5(9)  |
| C(9)-C(10)  | 1.39(3)   | C(23)-P(1)-Pt(1) | 111.8(4)  |
| C(10)-C(11) | 1.39(3)   | C(29)-P(1)-Pt(1) | 107.7(7)  |
| C(11)-C(12) | 1.59(3)   | C(17)-P(1)-Pt(1) | 120.4(4)  |
| C(12)-C(13) | 1.55(3)   | C(31)-P(2)-C(30) | 102.8(11) |
| C(13)-C(14) | 1.52(3)   | C(31)-P(2)-C(37) | 104.9(10) |
| C(14)-C(16) | 1.52(3)   | C(30)-P(2)-C(37) | 116.6(12) |
| C(17)-C(18) | 1.3900    | C(31)-P(2)-Pt(1) | 115.0(7)  |
| C(17)-C(22) | 1.3900    | C(30)-P(2)-Pt(1) | 109.1(9)  |
| C(18)-C(19) | 1.3900    | C(37)-P(2)-Pt(1) | 108.6(8)  |
| C(19)-C(20) | 1.3900    | C(38)-P(3)-C(39) | 112.1(11) |
| C(20)-C(21) | 1.3900    | C(38)-P(3)-C(45) | 102.4(10) |
| C(21)-C(22) | 1.3900    | C(39)-P(3)-C(45) | 103.3(7)  |
| C(23)-C(24) | 1.4109    | C(38)-P(3)-Pt(1) | 106.6(9)  |
| C(23)-C(28) | 1.4206    | C(39)-P(3)-Pt(1) | 121.0(4)  |
| C(24)-C(25) | 1.3950    | C(45)-P(3)-Pt(1) | 109.8(4)  |
| C(25)-C(26) | 1.4479    | C(14)-C(1)-C(2)  | 119.1(19) |
| C(26)-C(27) | 1.4215    | C(14)-C(1)-Pt(1) | 121.5(17) |
| C(27)-C(28) | 1.3596    | C(2)-C(1)-Pt(1)  | 119.0(14) |
| C(29)-C(30) | 1.53(3)   | C(1)-C(2)-C(3)   | 113.6(17) |
| C(31)-C(32) | 1.3900    | C(4)-C(3)-C(2)   | 108.3(19) |
| C(31)-C(36) | 1.3900    | O(5)-C(4)-C(3)   | 107(2)    |
| C(32)-C(33) | 1.3900    | O(5)-C(4)-C(13)  | 107.8(18) |
| C(33)-C(34) | 1.3900    | C(3)-C(4)-C(13)  | 108.8(17) |
| C(34)-C(35) | 1.3900    | O(5)-C(4)-C(15)  | 106.7(16) |
| C(35)-C(36) | 1.3900    | C(3)-C(4)-C(15)  | 111(2)    |
| C(37)-C(38) | 1.51(4)   | C(13)-C(4)-C(15) | 115(2)    |

|                   |           |                   |           |
|-------------------|-----------|-------------------|-----------|
| C(6)-O(5)-C(4)    | 117.1(19) | C(30)-C(29)-P(1)  | 112.1(17) |
| C(11)-C(6)-O(5)   | 125(2)    | C(29)-C(30)-P(2)  | 105.9(17) |
| C(11)-C(6)-C(7)   | 120(2)    | C(32)-C(31)-C(36) | 120.0     |
| O(5)-C(6)-C(7)    | 115(2)    | C(32)-C(31)-P(2)  | 119.4(11) |
| C(8)-C(7)-C(6)    | 117(2)    | C(36)-C(31)-P(2)  | 120.6(11) |
| C(9)-C(8)-C(7)    | 124(3)    | C(31)-C(32)-C(33) | 120.0     |
| C(8)-C(9)-C(10)   | 121(2)    | C(34)-C(33)-C(32) | 120.0     |
| C(9)-C(10)-C(11)  | 118(3)    | C(33)-C(34)-C(35) | 120.0     |
| C(6)-C(11)-C(10)  | 121(3)    | C(34)-C(35)-C(36) | 120.0     |
| C(6)-C(11)-C(12)  | 120(2)    | C(35)-C(36)-C(31) | 120.0     |
| C(10)-C(11)-C(12) | 118(3)    | C(38)-C(37)-P(2)  | 107.1(16) |
| C(13)-C(12)-C(11) | 107(2)    | C(37)-C(38)-P(3)  | 111.8(16) |
| C(4)-C(13)-C(14)  | 112.8(19) | C(40)-C(39)-C(44) | 120.0     |
| C(4)-C(13)-C(12)  | 110.2(18) | C(40)-C(39)-P(3)  | 108.3(5)  |
| C(14)-C(13)-C(12) | 114(2)    | C(44)-C(39)-P(3)  | 131.7(5)  |
| C(1)-C(14)-C(13)  | 123(2)    | C(41)-C(40)-C(39) | 120.0     |
| C(1)-C(14)-C(16)  | 123(2)    | C(40)-C(41)-C(42) | 120.0     |
| C(13)-C(14)-C(16) | 114(2)    | C(43)-C(42)-C(41) | 120.0     |
| C(18)-C(17)-C(22) | 120.0     | C(42)-C(43)-C(44) | 120.0     |
| C(18)-C(17)-P(1)  | 119.7(5)  | C(43)-C(44)-C(39) | 120.0     |
| C(22)-C(17)-P(1)  | 120.3(5)  | C(50)-C(45)-C(46) | 122.1     |
| C(19)-C(18)-C(17) | 120.0     | C(50)-C(45)-P(3)  | 115.2(5)  |
| C(18)-C(19)-C(20) | 120.0     | C(46)-C(45)-P(3)  | 121.0(5)  |
| C(21)-C(20)-C(19) | 120.0     | C(47)-C(46)-C(45) | 115.6     |
| C(20)-C(21)-C(22) | 120.0     | C(46)-C(47)-C(48) | 119.4     |
| C(21)-C(22)-C(17) | 120.0     | C(49)-C(48)-C(47) | 124.0     |
| C(24)-C(23)-C(28) | 123.3     | C(48)-C(49)-C(50) | 117.7     |
| C(24)-C(23)-P(1)  | 118.8(3)  | C(45)-C(50)-C(49) | 120.2     |
| C(28)-C(23)-P(1)  | 117.8(3)  | F(4)-B(1)-F(2)    | 108(2)    |
| C(25)-C(24)-C(23) | 116.4     | F(4)-B(1)-F(1)    | 106(3)    |
| C(24)-C(25)-C(26) | 123.2     | F(2)-B(1)-F(1)    | 101(3)    |
| C(27)-C(26)-C(25) | 115.4     | F(4)-B(1)-F(3)    | 109(2)    |
| C(28)-C(27)-C(26) | 124.2     | F(2)-B(1)-F(3)    | 109(3)    |
| C(27)-C(28)-C(23) | 117.5     | F(1)-B(1)-F(3)    | 123(3)    |

**Table S4.** Anisotropic displacement parameters ( $\text{\AA}^2 \times 10^3$ ) for **3**. The anisotropic displacement factor exponent takes the form:  $-2\pi^2 [h^2 a^{*2} U^{11} + \dots + 2 h k a^* b^* U^{12}]$

|       | U <sup>11</sup> | U <sup>22</sup> | U <sup>33</sup> | U <sup>23</sup> | U <sup>13</sup> | U <sup>12</sup> |
|-------|-----------------|-----------------|-----------------|-----------------|-----------------|-----------------|
| Pt(1) | 32(1)           | 80(1)           | 65(1)           | 1(1)            | 22(1)           | -3(1)           |
| P(1)  | 37(3)           | 82(5)           | 50(4)           | 8(4)            | 19(3)           | -4(3)           |
| P(2)  | 42(3)           | 79(5)           | 74(5)           | 3(4)            | 33(3)           | 1(3)            |
| P(3)  | 27(3)           | 114(6)          | 73(5)           | -6(4)           | 23(3)           | -6(3)           |
| C(1)  | 29(9)           | 32(12)          | 51(13)          | -10(12)         | 4(9)            | -11(10)         |
| C(2)  | 49(13)          | 49(15)          | 63(17)          | -18(12)         | 24(12)          | -9(11)          |
| C(3)  | 72(16)          | 57(16)          | 55(17)          | 13(13)          | 30(13)          | 7(13)           |
| C(4)  | 73(15)          | 63(16)          | 52(15)          | -15(14)         | 40(12)          | -14(14)         |
| O(5)  | 61(9)           | 55(11)          | 75(12)          | 5(10)           | 23(8)           | -22(9)          |
| C(6)  | 47(13)          | 43(16)          | 75(19)          | 1(14)           | 21(12)          | 3(11)           |
| C(7)  | 53(13)          | 90(20)          | 46(15)          | -4(14)          | 28(12)          | 7(13)           |
| C(8)  | 73(17)          | 80(20)          | 46(16)          | 11(16)          | 13(13)          | 1(15)           |



|       |         |         |         |         |         |         |
|-------|---------|---------|---------|---------|---------|---------|
| C(9)  | 62(15)  | 80(20)  | 80(20)  | -33(18) | 51(15)  | -4(14)  |
| C(10) | 48(13)  | 64(18)  | 110(20) | -4(16)  | 42(15)  | 3(12)   |
| C(11) | 38(12)  | 90(20)  | 69(18)  | -18(17) | 17(12)  | 5(13)   |
| C(12) | 67(15)  | 50(16)  | 80(20)  | -16(14) | 37(14)  | 0(12)   |
| C(13) | 38(12)  | 66(17)  | 68(18)  | 4(13)   | 14(12)  | 0(11)   |
| C(14) | 34(11)  | 42(15)  | 110(20) | 1(15)   | 30(13)  | 1(10)   |
| C(15) | 67(15)  | 59(17)  | 71(17)  | 4(13)   | 41(13)  | -16(12) |
| C(16) | 50(14)  | 120(20) | 67(18)  | -11(16) | 31(13)  | -21(15) |
| C(17) | 17(9)   | 89(18)  | 78(14)  | 4(12)   | 12(9)   | -16(9)  |
| C(18) | 36(11)  | 94(19)  | 82(13)  | 12(14)  | 25(11)  | 8(10)   |
| C(19) | 53(14)  | 100(20) | 101(15) | 28(15)  | 29(12)  | 28(13)  |
| C(20) | 22(10)  | 170(30) | 109(18) | 64(16)  | 32(12)  | 3(13)   |
| C(21) | 36(13)  | 130(30) | 112(15) | 28(19)  | -9(14)  | -9(11)  |
| C(22) | 44(13)  | 110(20) | 96(14)  | 17(15)  | -11(12) | -16(12) |
| C(23) | 28(8)   | 92(13)  | 31(12)  | -4(12)  | -1(9)   | -8(8)   |
| C(24) | 49(11)  | 78(12)  | 140(30) | -1(18)  | 47(16)  | -6(10)  |
| C(25) | 67(15)  | 91(14)  | 170(30) | 0(20)   | 80(20)  | -14(10) |
| C(26) | 60(12)  | 76(12)  | 77(18)  | 3(15)   | 18(14)  | -21(10) |
| C(27) | 54(11)  | 95(13)  | 69(17)  | 9(15)   | 20(13)  | -2(10)  |
| C(28) | 30(10)  | 94(15)  | 63(16)  | 20(15)  | 8(11)   | -1(8)   |
| C(29) | 48(12)  | 100(20) | 42(13)  | 12(15)  | 17(10)  | -19(14) |
| C(30) | 100(20) | 90(20)  | 58(18)  | -3(15)  | 27(16)  | 28(17)  |
| C(31) | 12(9)   | 80(13)  | 99(18)  | -10(12) | 5(10)   | 8(10)   |
| C(32) | 38(12)  | 89(14)  | 89(18)  | 6(14)   | 0(12)   | 2(13)   |
| C(33) | 49(15)  | 110(18) | 130(20) | 36(16)  | 0(16)   | 4(17)   |
| C(34) | 43(14)  | 81(14)  | 160(30) | 45(17)  | 15(16)  | -1(14)  |
| C(35) | 59(16)  | 71(12)  | 190(30) | 28(16)  | 50(20)  | 3(15)   |
| C(36) | 65(16)  | 54(13)  | 110(20) | 8(12)   | 15(15)  | 11(13)  |
| C(37) | 36(12)  | 110(20) | 67(18)  | 2(16)   | 35(12)  | 10(13)  |
| C(38) | 42(13)  | 110(30) | 130(30) | 10(20)  | 52(16)  | 11(15)  |
| C(39) | 72(11)  | 240(20) | 163(19) | -65(19) | 79(13)  | -7(13)  |
| C(40) | 72(12)  | 240(20) | 168(19) | -69(18) | 82(13)  | -9(13)  |
| C(41) | 74(11)  | 240(20) | 171(19) | -72(19) | 76(13)  | -8(13)  |
| C(42) | 76(12)  | 240(20) | 180(19) | -71(19) | 57(14)  | -6(13)  |
| C(43) | 80(12)  | 240(20) | 174(19) | -71(19) | 56(14)  | 1(13)   |
| C(44) | 82(12)  | 250(20) | 168(19) | -67(19) | 63(14)  | -1(13)  |
| C(45) | 39(10)  | 116(17) | 80(20)  | 17(15)  | 21(12)  | 2(10)   |
| C(46) | 55(11)  | 116(17) | 90(20)  | 7(18)   | 16(12)  | 13(13)  |
| C(47) | 98(18)  | 99(18)  | 130(30) | -37(19) | 12(18)  | 29(15)  |
| C(48) | 110(20) | 105(19) | 180(40) | -10(30) | -30(20) | 23(14)  |
| C(49) | 74(16)  | 95(14)  | 220(40) | -20(30) | 26(19)  | 28(15)  |
| C(50) | 57(13)  | 97(15)  | 120(30) | -7(19)  | 11(14)  | 7(13)   |
| B(1)  | 62(18)  | 140(20) | 130(30) | 30(20)  | 25(14)  | 0(20)   |
| F(1)  | 390(40) | 121(17) | 180(30) | 22(16)  | 20(20)  | 1(17)   |
| F(2)  | 108(14) | 300(30) | 300(30) | 50(30)  | 70(16)  | -80(20) |
| F(3)  | 250(30) | 250(30) | 145(18) | 2(19)   | 56(18)  | 60(30)  |
| F(4)  | 92(12)  | 340(30) | 170(20) | -40(20) | -15(14) | 48(18)  |

**Table S5.** Hydrogen coordinates ( $\times 10^4$ ) and isotropic displacement parameters ( $\text{\AA}^2 \times 10^{-3}$ ) for **3**.

---

|  | x | y | z | U(eq) |
|--|---|---|---|-------|
|--|---|---|---|-------|

---

---

|        |       |       |       |     |
|--------|-------|-------|-------|-----|
| H(2A)  | 4474  | 9891  | 1696  | 62  |
| H(2B)  | 2943  | 10046 | 1519  | 62  |
| H(3A)  | 2578  | 9687  | 333   | 70  |
| H(3B)  | 3855  | 10084 | 451   | 70  |
| H(7)   | 4698  | 9150  | -1553 | 70  |
| H(8)   | 5269  | 8339  | -2088 | 80  |
| H(9)   | 5507  | 7511  | -1532 | 84  |
| H(10)  | 5236  | 7418  | -337  | 82  |
| H(12A) | 3964  | 7835  | 549   | 77  |
| H(12B) | 5294  | 8169  | 926   | 77  |
| H(13)  | 2789  | 8679  | 266   | 68  |
| H(15A) | 6273  | 9041  | 686   | 92  |
| H(15B) | 5832  | 9213  | 1410  | 92  |
| H(15C) | 6026  | 9691  | 846   | 92  |
| H(16A) | 3796  | 7930  | 1812  | 112 |
| H(16B) | 2372  | 7947  | 1254  | 112 |
| H(16C) | 2574  | 8198  | 2061  | 112 |
| H(18)  | 5480  | 8640  | 2357  | 83  |
| H(19)  | 7116  | 7989  | 2276  | 98  |
| H(20)  | 8643  | 7691  | 3336  | 116 |
| H(21)  | 8535  | 8044  | 4477  | 115 |
| H(22)  | 6899  | 8696  | 4558  | 106 |
| H(24)  | 7368  | 9646  | 3480  | 101 |
| H(25)  | 8272  | 10550 | 3438  | 120 |
| H(26)  | 7003  | 11394 | 3465  | 85  |
| H(27)  | 4752  | 11274 | 3460  | 86  |
| H(28)  | 3803  | 10400 | 3465  | 76  |
| H(29A) | 4600  | 8818  | 4623  | 76  |
| H(29B) | 5300  | 9421  | 4794  | 76  |
| H(30A) | 3277  | 9894  | 4482  | 96  |
| H(30B) | 3083  | 9383  | 5008  | 96  |
| H(32)  | 1149  | 8756  | 5002  | 90  |
| H(33)  | 809   | 7855  | 5430  | 120 |
| H(34)  | 1245  | 7053  | 4804  | 116 |
| H(35)  | 2021  | 7152  | 3751  | 126 |
| H(36)  | 2361  | 8053  | 3323  | 93  |
| H(37A) | -78   | 9389  | 3991  | 79  |
| H(37B) | 450   | 9917  | 3610  | 79  |
| H(38A) | -1221 | 9509  | 2717  | 108 |
| H(38B) | -618  | 8890  | 2907  | 108 |
| H(40)  | -507  | 8355  | 1952  | 183 |
| H(41)  | -1572 | 7747  | 1014  | 186 |
| H(42)  | -1956 | 8034  | -206  | 194 |
| H(43)  | -1274 | 8929  | -489  | 194 |
| H(44)  | -209  | 9537  | 449   | 191 |
| H(46)  | -1761 | 10153 | 1396  | 103 |
| H(47)  | -1837 | 11141 | 1154  | 133 |
| H(48)  | -104  | 11706 | 1803  | 170 |
| H(49)  | 1957  | 11333 | 2372  | 157 |
| H(50)  | 2156  | 10336 | 2524  | 112 |

---

**Table S6.** Torsion angles [°] for **3**.

|                       |            |                         |            |
|-----------------------|------------|-------------------------|------------|
| C(1)-Pt(1)-P(1)-C(23) | 70.9(7)    | C(9)-C(10)-C(11)-C(12)  | 174(2)     |
| P(2)-Pt(1)-P(1)-C(23) | -110.5(4)  | C(6)-C(11)-C(12)-C(13)  | 14(3)      |
| P(3)-Pt(1)-P(1)-C(23) | -56.9(9)   | C(10)-C(11)-C(12)-C(13) | -159(2)    |
| C(1)-Pt(1)-P(1)-C(29) | -176.6(11) | O(5)-C(4)-C(13)-C(14)   | -165.0(18) |
| P(2)-Pt(1)-P(1)-C(29) | 2.0(10)    | C(3)-C(4)-C(13)-C(14)   | -49(3)     |
| P(3)-Pt(1)-P(1)-C(29) | 55.7(13)   | C(15)-C(4)-C(13)-C(14)  | 76(2)      |
| C(1)-Pt(1)-P(1)-C(17) | -54.5(7)   | O(5)-C(4)-C(13)-C(12)   | 66(2)      |
| P(2)-Pt(1)-P(1)-C(17) | 124.1(5)   | C(3)-C(4)-C(13)-C(12)   | -178(2)    |
| P(3)-Pt(1)-P(1)-C(17) | 177.8(7)   | C(15)-C(4)-C(13)-C(12)  | -53(3)     |
| C(1)-Pt(1)-P(2)-C(31) | 53(14)     | C(11)-C(12)-C(13)-C(4)  | -49(2)     |
| P(1)-Pt(1)-P(2)-C(31) | -92.9(6)   | C(11)-C(12)-C(13)-C(14) | -177.4(19) |
| P(3)-Pt(1)-P(2)-C(31) | 100.8(6)   | C(2)-C(1)-C(14)-C(13)   | 4(3)       |
| C(1)-Pt(1)-P(2)-C(30) | 167(14)    | Pt(1)-C(1)-C(14)-C(13)  | 176.6(15)  |
| P(1)-Pt(1)-P(2)-C(30) | 21.8(10)   | C(2)-C(1)-C(14)-C(16)   | -178.0(19) |
| P(3)-Pt(1)-P(2)-C(30) | -144.4(10) | Pt(1)-C(1)-C(14)-C(16)  | -5(3)      |
| C(1)-Pt(1)-P(2)-C(37) | -65(14)    | C(4)-C(13)-C(14)-C(1)   | 14(3)      |
| P(1)-Pt(1)-P(2)-C(37) | 149.9(10)  | C(12)-C(13)-C(14)-C(1)  | 140(2)     |
| P(3)-Pt(1)-P(2)-C(37) | -16.4(10)  | C(4)-C(13)-C(14)-C(16)  | -164.5(19) |
| C(1)-Pt(1)-P(3)-C(38) | 171.1(12)  | C(12)-C(13)-C(14)-C(16) | -38(3)     |
| P(2)-Pt(1)-P(3)-C(38) | -7.1(11)   | C(23)-P(1)-C(17)-C(18)  | -92.3(6)   |
| P(1)-Pt(1)-P(3)-C(38) | -60.6(14)  | C(29)-P(1)-C(17)-C(18)  | 158.5(8)   |
| C(1)-Pt(1)-P(3)-C(39) | 41.5(9)    | Pt(1)-P(1)-C(17)-C(18)  | 35.8(5)    |
| P(2)-Pt(1)-P(3)-C(39) | -136.7(7)  | C(23)-P(1)-C(17)-C(22)  | 86.7(7)    |
| P(1)-Pt(1)-P(3)-C(39) | 169.8(8)   | C(29)-P(1)-C(17)-C(22)  | -22.6(9)   |
| C(1)-Pt(1)-P(3)-C(45) | -78.6(7)   | Pt(1)-P(1)-C(17)-C(22)  | -145.3(4)  |
| P(2)-Pt(1)-P(3)-C(45) | 103.2(5)   | C(22)-C(17)-C(18)-C(19) | 0.0        |
| P(1)-Pt(1)-P(3)-C(45) | 49.7(10)   | P(1)-C(17)-C(18)-C(19)  | 178.9(4)   |
| P(2)-Pt(1)-C(1)-C(14) | -41(15)    | C(17)-C(18)-C(19)-C(20) | 0.0        |
| P(1)-Pt(1)-C(1)-C(14) | 103.9(16)  | C(18)-C(19)-C(20)-C(21) | 0.0        |
| P(3)-Pt(1)-C(1)-C(14) | -89.5(16)  | C(19)-C(20)-C(21)-C(22) | 0.0        |
| P(2)-Pt(1)-C(1)-C(2)  | 131(14)    | C(20)-C(21)-C(22)-C(17) | 0.0        |
| P(1)-Pt(1)-C(1)-C(2)  | -83.5(14)  | C(18)-C(17)-C(22)-C(21) | 0.0        |
| P(3)-Pt(1)-C(1)-C(2)  | 83.0(14)   | P(1)-C(17)-C(22)-C(21)  | -178.9(4)  |
| C(14)-C(1)-C(2)-C(3)  | 14(3)      | C(29)-P(1)-C(23)-C(24)  | 107.8(9)   |
| Pt(1)-C(1)-C(2)-C(3)  | -158.8(14) | C(17)-P(1)-C(23)-C(24)  | -3.9(9)    |
| C(1)-C(2)-C(3)-C(4)   | -49(2)     | Pt(1)-P(1)-C(23)-C(24)  | -136.8(5)  |
| C(2)-C(3)-C(4)-O(5)   | -177.1(17) | C(29)-P(1)-C(23)-C(28)  | -72.7(8)   |
| C(2)-C(3)-C(4)-C(13)  | 67(2)      | C(17)-P(1)-C(23)-C(28)  | 175.6(4)   |
| C(2)-C(3)-C(4)-C(15)  | -61(2)     | Pt(1)-P(1)-C(23)-C(28)  | 42.6(4)    |
| C(3)-C(4)-O(5)-C(6)   | -162.3(18) | C(28)-C(23)-C(24)-C(25) | 1.1        |
| C(13)-C(4)-O(5)-C(6)  | -45(2)     | P(1)-C(23)-C(24)-C(25)  | -179.5(5)  |
| C(15)-C(4)-O(5)-C(6)  | 78(2)      | C(23)-C(24)-C(25)-C(26) | 1.1        |
| C(4)-O(5)-C(6)-C(11)  | 10(3)      | C(24)-C(25)-C(26)-C(27) | -2.1       |
| C(4)-O(5)-C(6)-C(7)   | -168.5(18) | C(25)-C(26)-C(27)-C(28) | 1.0        |
| C(11)-C(6)-C(7)-C(8)  | 2(3)       | C(26)-C(27)-C(28)-C(23) | 0.9        |
| O(5)-C(6)-C(7)-C(8)   | -180(2)    | C(24)-C(23)-C(28)-C(27) | -2.1       |
| C(6)-C(7)-C(8)-C(9)   | 0(4)       | P(1)-C(23)-C(28)-C(27)  | 178.5(5)   |
| C(7)-C(8)-C(9)-C(10)  | -1(4)      | C(23)-P(1)-C(29)-C(30)  | 87.4(19)   |
| C(8)-C(9)-C(10)-C(11) | 0(4)       | C(17)-P(1)-C(29)-C(30)  | -161.3(18) |
| O(5)-C(6)-C(11)-C(10) | 179(2)     | Pt(1)-P(1)-C(29)-C(30)  | -31(2)     |
| C(7)-C(6)-C(11)-C(10) | -3(3)      | P(1)-C(29)-C(30)-P(2)   | 48(2)      |
| O(5)-C(6)-C(11)-C(12) | 7(3)       | C(31)-P(2)-C(30)-C(29)  | 77.3(19)   |
| C(7)-C(6)-C(11)-C(12) | -175(2)    | C(37)-P(2)-C(30)-C(29)  | -168.7(16) |
| C(9)-C(10)-C(11)-C(6) | 2(3)       | Pt(1)-P(2)-C(30)-C(29)  | -45(2)     |

|                         |            |                         |           |
|-------------------------|------------|-------------------------|-----------|
| C(30)-P(2)-C(31)-C(32)  | 63.1(12)   | C(45)-P(3)-C(39)-C(44)  | 25.6(11)  |
| C(37)-P(2)-C(31)-C(32)  | -59.2(13)  | Pt(1)-P(3)-C(39)-C(44)  | -97.7(9)  |
| Pt(1)-P(2)-C(31)-C(32)  | -178.5(7)  | C(44)-C(39)-C(40)-C(41) | 0.0       |
| C(30)-P(2)-C(31)-C(36)  | -118.4(12) | P(3)-C(39)-C(40)-C(41)  | -179.9(5) |
| C(37)-P(2)-C(31)-C(36)  | 119.2(12)  | C(39)-C(40)-C(41)-C(42) | 0.0       |
| Pt(1)-P(2)-C(31)-C(36)  | -0.1(10)   | C(40)-C(41)-C(42)-C(43) | 0.0       |
| C(36)-C(31)-C(32)-C(33) | 0.0        | C(41)-C(42)-C(43)-C(44) | 0.0       |
| P(2)-C(31)-C(32)-C(33)  | 178.4(11)  | C(42)-C(43)-C(44)-C(39) | 0.0       |
| C(31)-C(32)-C(33)-C(34) | 0.0        | C(40)-C(39)-C(44)-C(43) | 0.0       |
| C(32)-C(33)-C(34)-C(35) | 0.0        | P(3)-C(39)-C(44)-C(43)  | 179.9(7)  |
| C(33)-C(34)-C(35)-C(36) | 0.0        | C(38)-P(3)-C(45)-C(50)  | 99.9(10)  |
| C(34)-C(35)-C(36)-C(31) | 0.0        | C(39)-P(3)-C(45)-C(50)  | -143.5(5) |
| C(32)-C(31)-C(36)-C(35) | 0.0        | Pt(1)-P(3)-C(45)-C(50)  | -13.1(5)  |
| P(2)-C(31)-C(36)-C(35)  | -178.4(11) | C(38)-P(3)-C(45)-C(46)  | -65.6(12) |
| C(31)-P(2)-C(37)-C(38)  | -81.8(19)  | C(39)-P(3)-C(45)-C(46)  | 51.0(9)   |
| C(30)-P(2)-C(37)-C(38)  | 165.3(19)  | Pt(1)-P(3)-C(45)-C(46)  | -178.6(6) |
| Pt(1)-P(2)-C(37)-C(38)  | 42(2)      | C(50)-C(45)-C(46)-C(47) | 10.3      |
| P(2)-C(37)-C(38)-P(3)   | -49(2)     | P(3)-C(45)-C(46)-C(47)  | 174.8(6)  |
| C(39)-P(3)-C(38)-C(37)  | 170.2(17)  | C(45)-C(46)-C(47)-C(48) | -11.1     |
| C(45)-P(3)-C(38)-C(37)  | -80(2)     | C(46)-C(47)-C(48)-C(49) | 9.7       |
| Pt(1)-P(3)-C(38)-C(37)  | 36(2)      | C(47)-C(48)-C(49)-C(50) | -5.8      |
| C(38)-P(3)-C(39)-C(40)  | -45.0(11)  | C(46)-C(45)-C(50)-C(49) | -7.0      |
| C(45)-P(3)-C(39)-C(40)  | -154.5(5)  | P(3)-C(45)-C(50)-C(49)  | -172.3(6) |
| Pt(1)-P(3)-C(39)-C(40)  | 82.2(5)    | C(48)-C(49)-C(50)-C(45) | 4.5       |
| C(38)-P(3)-C(39)-C(44)  | 135.1(13)  |                         |           |

<sup>1</sup> Commercial MeNO<sub>2</sub> contains traces of propionitrile that poisons Pt<sup>2+</sup> catalysts; for purification, see: F. W. Parrett, M. S. Sun, *J. Chem. Educ.* **1977**, *54*, 448.

<sup>2</sup> Clark, H. C.; Manzer, L. E. *J. Organomet. Chem.* **1973**, *59*, 411-428.

<sup>3</sup>Feducia, J. A.; Campbell, A. N.; Doherty, M. Q.; Gagné, M. R. *J. Am. Chem. Soc.* **2006**, *128*, 13290-13297.

<sup>4</sup>Feducia, J. A.; Campbell, A. N.; Anthis, J. W.; Gagné, M. R. *Organometallics* **2006**, *25*, 3114-3117.

<sup>5</sup> Elliot, M. R.; Dhimane, A.-L.; Hamon, L.; Malacria, M. *Eur. J. Org. Chem.* **2000**, 155-163.

<sup>6</sup> Mullen, C. A.; Gagné, M. R. *J. Am. Chem. Soc.* **2007**, *129*, 11880-11881.

<sup>7</sup> Gabe, E. J.; Le Page, Y.; Charland, J. P.; Lee, F. L.; White, P. S. *J. Appl. Crystallogr.* **1989**, *22*, 384.
